# Supplementary material
Source: Elsevier journal article supplement (https://comptes-rendus.academie-sciences.fr/chimie/article/10.1016/j.crci.2012.04.010/file/attach/mmc1.pdf)
Supplement: mmc1 [file mmc1.pdf]

## Supplementary Information

Table 2. The Cartesian coordinates for the crystal structures and optimized [B3LYP/6-311+G(2d,2p)] structures of the two isomers of  $H_{11}O_5^+$  (IYEPEH and BEXFEQ), and the  $H_{15}O_7^+$  (NEBDII).

|     | IYEPEH  |        |        |           |        |        | BEXFEQ  |        |        |           |        |        | NEBDII  |        |        |           |        |        |
|-----|---------|--------|--------|-----------|--------|--------|---------|--------|--------|-----------|--------|--------|---------|--------|--------|-----------|--------|--------|
|     | CRYSTAL |        |        | OPTIMIZED |        |        | CRYSTAL |        |        | OPTIMIZED |        |        | CRYSTAL |        |        | OPTIMIZED |        |        |
|     | X       | Y      | Z      | X         | Y      | Z      | X       | Y      | Z      | X         | Y      | Z      | X       | Y      | Z      | X         | Y      | Z      |
| O1  | -2.688  | -0.195 | 0.648  | 0.980     | 0.022  | -0.715 | -2.484  | 0.758  | -0.340 | -2.492    | 0.000  | -0.517 | -2.826  | -1.128 | -0.696 | 1.239     | 0.739  | -1.389 |
| H1a | -1.991  | -0.087 | 0.174  | 1.858     | 0.026  | -0.220 | -1.825  | 0.913  | 0.066  | -2.757    | 0.000  | -1.447 | -2.638  | -0.192 | -0.568 | 0.701     | 1.483  | -0.916 |
| H1b | -2.569  | -0.801 | 1.232  | 0.420     | -0.802 | -0.497 | -2.687  | -0.331 | -0.296 | -1.899    | 0.846  | -0.288 | -3.679  | -1.289 | -0.294 | 1.950     | 0.404  | -0.737 |
| H1c | -2.889  | 0.475  | 1.127  | 0.403     | 0.833  | -0.492 | -3.319  | 1.397  | 0.086  | -1.899    | -0.846 | -0.288 | -2.204  | -1.678 | -0.207 | 0.614     | -0.032 | -1.561 |
| O2  | -0.820  | -0.135 | -0.957 | 3.280     | -0.028 | 0.458  | -0.215  | 1.711  | 0.036  | -0.915    | 1.813  | 0.078  | -2.363  | 1.363  | -0.049 | -0.192    | 2.406  | -0.140 |
| H2a | -0.370  | 0.557  | -0.753 | 3.485     | 0.144  | 1.382  | 0.317   | 1.209  | 0.304  | -0.145    | 1.366  | 0.491  | -1.399  | 1.316  | -0.179 | -0.553    | 1.974  | 0.658  |
| H2b | -0.335  | -0.825 | -0.859 | 4.101     | 0.049  | -0.039 | -0.019  | 2.329  | 0.467  | -1.158    | 2.578  | 0.610  | -2.455  | 1.908  | 0.744  | 0.077     | 3.302  | 0.086  |
| O3  | 0.447   | 2.044  | -0.399 | -0.675    | 1.851  | -0.069 | 1.536   | -0.182 | 0.456  | 0.994     | 0.000  | 0.944  | 0.046   | 1.668  | 0.389  | -1.236    | 0.602  | 1.703  |
| H3a | -0.164  | 2.483  | -0.008 | -0.800    | 2.695  | -0.514 | 1.557   | -0.600 | 1.120  | 1.805     | 0.000  | 0.380  | 0.508   | 2.306  | -0.180 | -0.633    | -0.162 | 1.773  |
| H3b | 0.904   | 2.571  | -0.900 | -1.547    | 1.438  | 0.052  | 2.250   | -0.172 | 0.130  | 1.306     | 0.000  | 1.856  | -0.129  | 2.186  | 1.187  | -1.562    | 0.784  | 2.591  |
| O4  | 2.262   | 0.254  | 0.969  | -2.819    | -0.022 | 0.369  | 4.182   | -0.542 | -0.281 | 3.163     | 0.000  | -0.659 | 1.285   | -0.293 | -0.665 | 0.522     | -1.627 | 1.232  |
| H4a | 2.016   | -0.478 | 0.611  | -3.60     | -0.027 | -0.192 | 4.338   | -1.301 | -0.395 | 3.685     | -0.771 | -0.901 | 1.145   | 0.617  | -0.365 | 0.461     | -2.429 | 1.763  |
| H4b | 1.831   | 0.897  | 0.620  | -3.151    | -0.029 | 1.276  | 4.663   | -0.079 | -0.675 | 3.685     | 0.771  | -0.901 | 0.470   | -0.453 | -1.149 | 0.199     | -1.856 | 0.341  |
| O5  | 0.982   | -1.958 | -0.345 | -0.631    | -1.845 | -0.078 | -2.900  | -1.682 | -0.044 | -0.915    | -1.813 | 0.078  | 3.867   | 0.606  | -0.451 | -2.692    | -0.520 | -0.505 |
| H5a | 0.569   | -2.450 | 0.206  | -1.516    | -1.460 | 0.040  | -3.663  | -1.684 | 0.111  | -1.157    | -2.578 | 0.610  | 3.305   | -0.086 | -0.061 | -2.505    | -0.015 | 0.303  |
| H5b | 1.544   | -2.424 | -0.783 | -0.727    | -2.697 | -0.514 | -2.565  | -2.183 | 0.458  | -0.145    | -1.366 | 0.491  | 4.753   | 0.199  | -0.389 | -3.469    | -0.135 | -0.920 |
| O6  |         |        |        |           |        |        |         |        |        |           |        |        | 5.628   | -1.200 | 0.740  | -0.372    | -1.326 | -1.466 |
| H6a |         |        |        |           |        |        |         |        |        |           |        |        | 4.758   | -1.528 | 1.014  | -0.408    | -1.935 | -2.212 |
| H6b |         |        |        |           |        |        |         |        |        |           |        |        | 6.042   | -1.821 | 0.126  | -1.305    | -1.052 | -1.254 |
| O7  |         |        |        |           |        |        |         |        |        |           |        |        | -5.261  | -1.038 | 0.601  | 2.790     | -0.156 | 0.421  |
| H7a |         |        |        |           |        |        |         |        |        |           |        |        | -5.277  | -0.073 | 0.712  | 2.273     | -0.830 | 0.895  |
| H7b |         |        |        |           |        |        |         |        |        |           |        |        | -6.209  | -1.238 | 0.659  | 3.702     | -0.454 | 0.351  |
